# Supplementary material for: A novel Monoclonal Antibody against Notch1 Targets Leukemia-associated Mutant Notch1 and Depletes Therapy Resistant Cancer Stem Cells in Solid Tumors
Source: PubMed Central journal article supplement (PMC4457015; doi:10.1038/srep11012), 2015-06-05
Supplement: srep11012-s1.pdf [file srep11012-s1.pdf]

Supplementary Information:-

A novel Monoclonal Antibody against Notch1 Targets Leukemia-associated Mutant Notch1 and Depletes Therapy Resistant Cancer Stem Cells in Solid Tumors

**Ankur Sharma<sup>1</sup>, Rupali A Gadkari<sup>2</sup>, Satthenapalli V Ramakanth<sup>1§</sup>, Krishnanand Padmanabhan<sup>1§</sup>, Davanam S Madhumathi<sup>3</sup>, Lakshmi Devi<sup>3</sup>, Lingappa Appaji<sup>4</sup>, Jon C Aster<sup>5</sup>, Annapoorni Rangarajan<sup>1</sup> and Rajan R Dighe<sup>1#</sup>**

<sup>1</sup>Department of Molecular Reproduction Development and Genetics, Indian Institute of Science Bangalore, Karnataka, India

<sup>2</sup>Molecular Biophysics Unit, Indian Institute of Science Bangalore, Karnataka, India

<sup>3</sup>Department of Pathology, Kidwai Memorial Institute of Oncology, Bangalore, Karnataka, India

<sup>4</sup>Department of Pediatric Oncology, Kidwai Memorial Institute of Oncology, Bangalore, Karnataka, India

<sup>5</sup>Department of Pathology, Brigham & Women's Hospital, Harvard Medical School, Boston, USA

§- SVR and KP equally contributed to the work.

\*Running Title: Targeting Notch1 Signaling in Cancer Stem Cells

\***Corresponding author:**

Rajan R Dighe, Professor, Department of Molecular Reproduction Development and Genetics, Indian Institute of Science, Bangalore 560012, India, Tel:

9180-2293-2660/3261

Fax: 9180-2360-0999, Email: [rdighe@mrdg.iisc.ernet.in](mailto:rdighe@mrdg.iisc.ernet.in)

## **Supplementary Legends:**

**Supplementary Figure 1: Notch1 mutational analysis in T-ALL patients.**

**Supplementary Figure 2: (A) Effect of MAb 604.107 on LIC subpopulation:** The CD34<sup>High</sup>/CD45<sup>High</sup> cells were flow-sorted from the patient derived PBL's followed by culture with control IgG or the MAb 604.107 (10µg/ml) for 72 hours and BrdU incorporation into DNA was determined. (B) Effect of MAb 604.107 on Notch target genes in CCRF-CEM cells.

**Supplementary Figure 3: Effect of MAb604.107 on long-term self-renewing sphere forming cells.** Breast cancer cell lines MCF-7 and MDA-MB-231 cells were allowed to form sphere in semisolid medium in presence of MAb 604.107 for 1 week followed by second generation of sphere formation in the absence of MAb.

**Supplementary Figure 4: Effect of MAb 604.107 on NICD-1, Hes-1, Caspase-3 and BCL-2 expression.** MDA-MB-231 and HCT-116 cells were treated with control of MAb604.107 (20µg/ml) for 48 hours at the end of which whole cell lysate was prepared and level of NICD-1, Hes-1, Caspase-3 and BCL-2 was evaluated in western blot. Beta-actin was used as normalizing control.

**Supplementary Figure 5: Effect of anti-Notch1 antibody treatment on stemness genes in breast and colon cancer cell lines.**

**Supplementary Figure 6: Effect of anti-Notch1 antibody treatment on EMT genes in breast and colon cancer cell lines.**

**Supplementary Figure 7: Effect of MAb604.107 on Dox resistant cell lines.** MDA-MB-231 and HCT-116 cells were cultured in the presence of Dox for three week and Dox-resistant cells lines were established. (A) Expression level of NICD-1 in Dox sensitive and resistant cells. (B) Dox sensitive and resistant MDA-MB-231 and HCT-116 cells were cultured in the presence of control IgG or MAb (20µg/ml) and BrdU incorporation was determined.

**Supplementary Figure 8: Effect of anti-Notch1 antibody treatment on Notch downstream targets and stemness genes in xenografts.**

**Supplementary Figure 9: Expression of NICD-1 in control of MAb treated (A) MDA-MB-231 and (B) HCT-116 xenografts.**

**Supplementary Figure 10: ELISA based epitope mapping of MAb604.107**

**Supplementary Table 1: Phage-display screening for epitope mapping.**

**Supplementary Table 2: Comparison between MAb604.107 with previously reported inhibitory anti-Notch1 Mab.**

# Supplementary Figure-1

## T-ALL 1

70 80 90  
G C T C C G C A G G G A G T G G A A G A G C T G T T G C G C

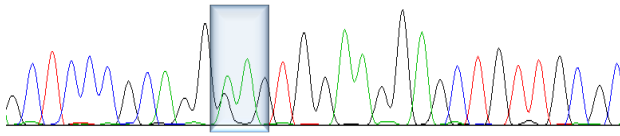

F1593S

## T-ALL 7

180 190 200 210  
G G A G C T C A G C C G C G T G C T G C A C C C A A G T G T C T T C

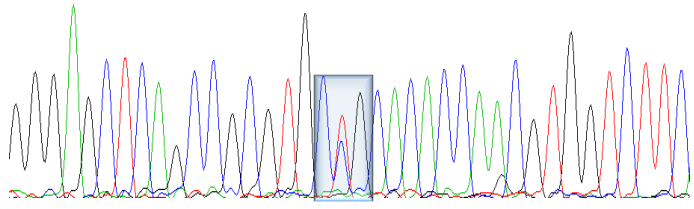

L1601P CTG - CCG

## T-ALL 8

90 100 110 120  
C A G A T A G T T G C A C C G C C G G C T G T T G G G C C A G T

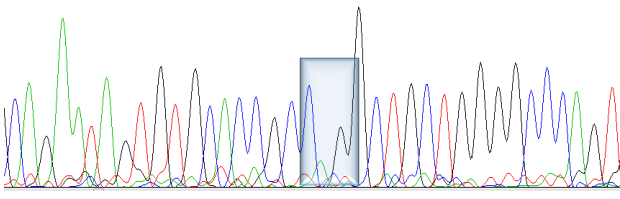

del CCA<CC(fs@L2451)

## T-ALL 16

100 110 120  
T G G C G G C C G C C A G C C G G T G C T G G T G G T G

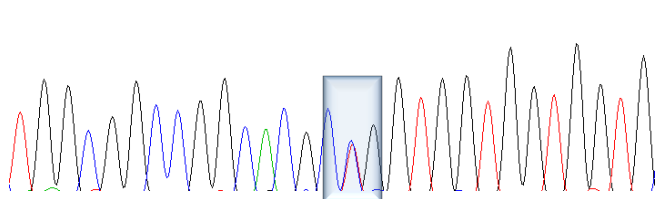

L1574P CTG - CCG

## T-ALL 12

170 180 190  
T C C A C T C T G C G G A G C T C A G C C C C C T G C T G C A

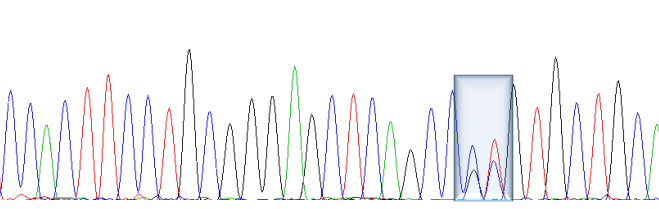

R1599P CGC-CCC

## T-ALL 17

170 180 190  
T C C C G C A C T C A C C C C C G T G C T G C A C C A C A

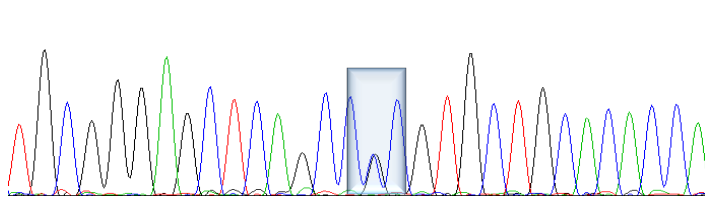

R1599P CGC-CCC

## Supplementary Figure-2

(A)

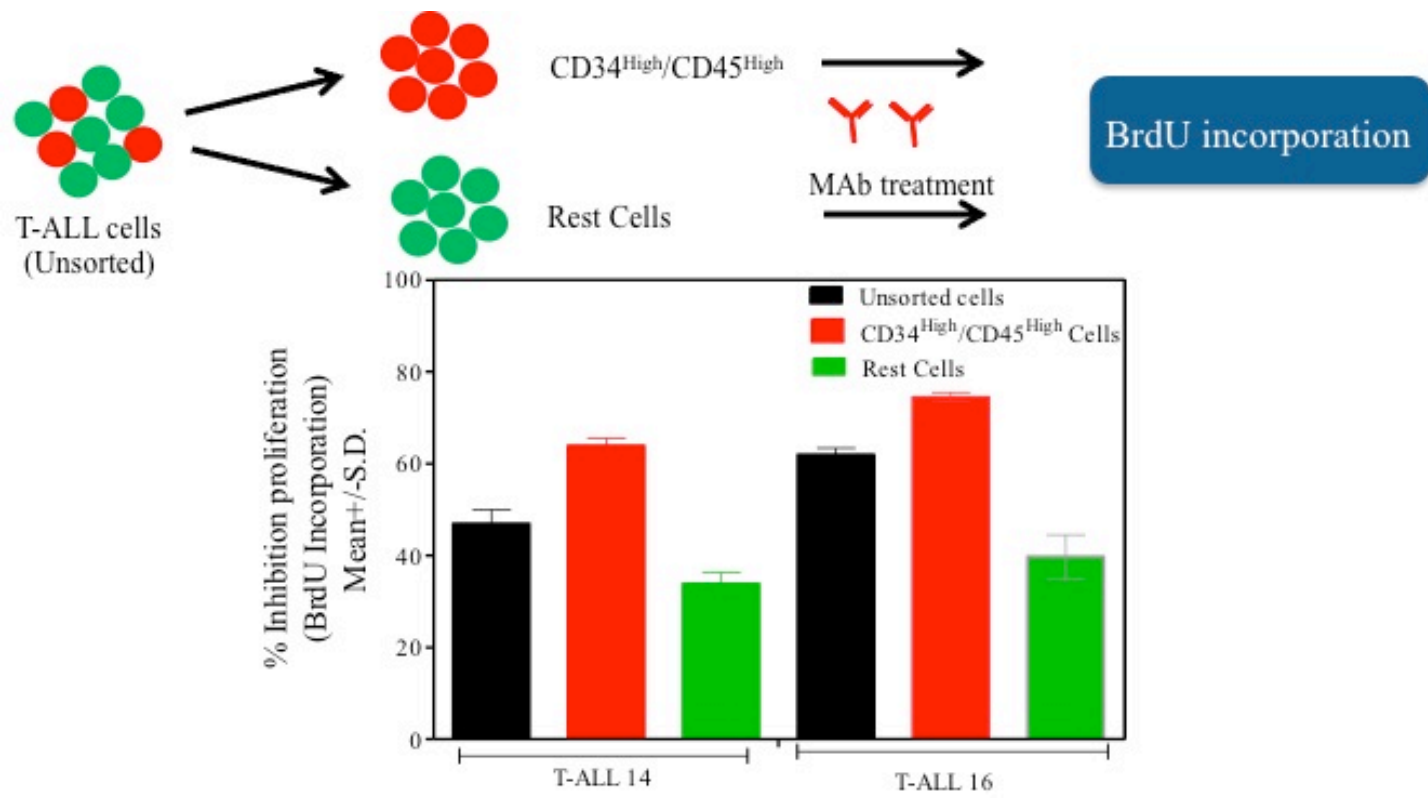

(B)

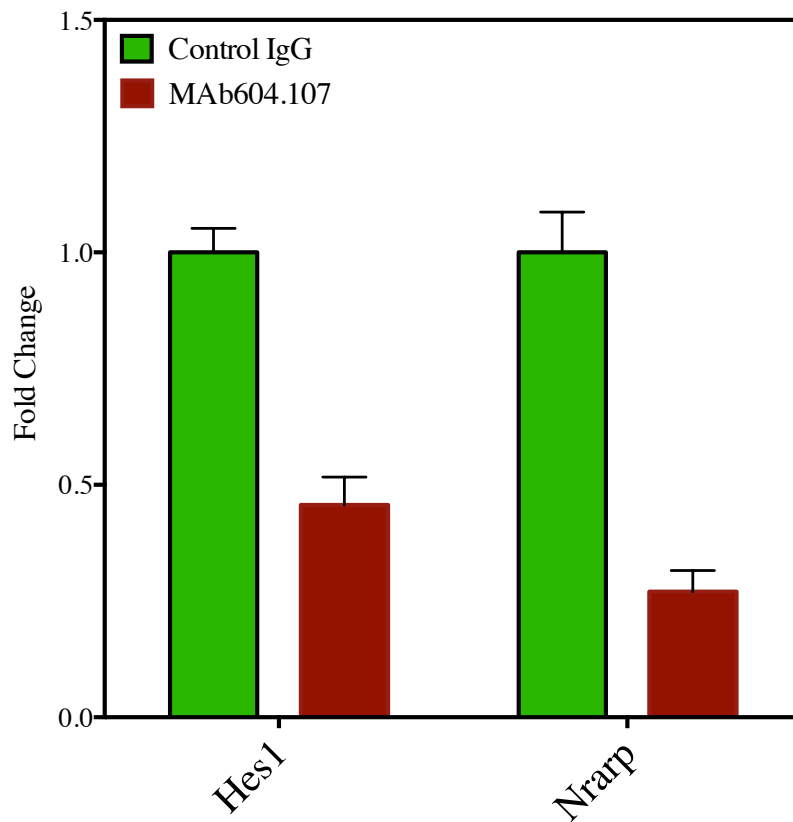

Supplementary Figure-3

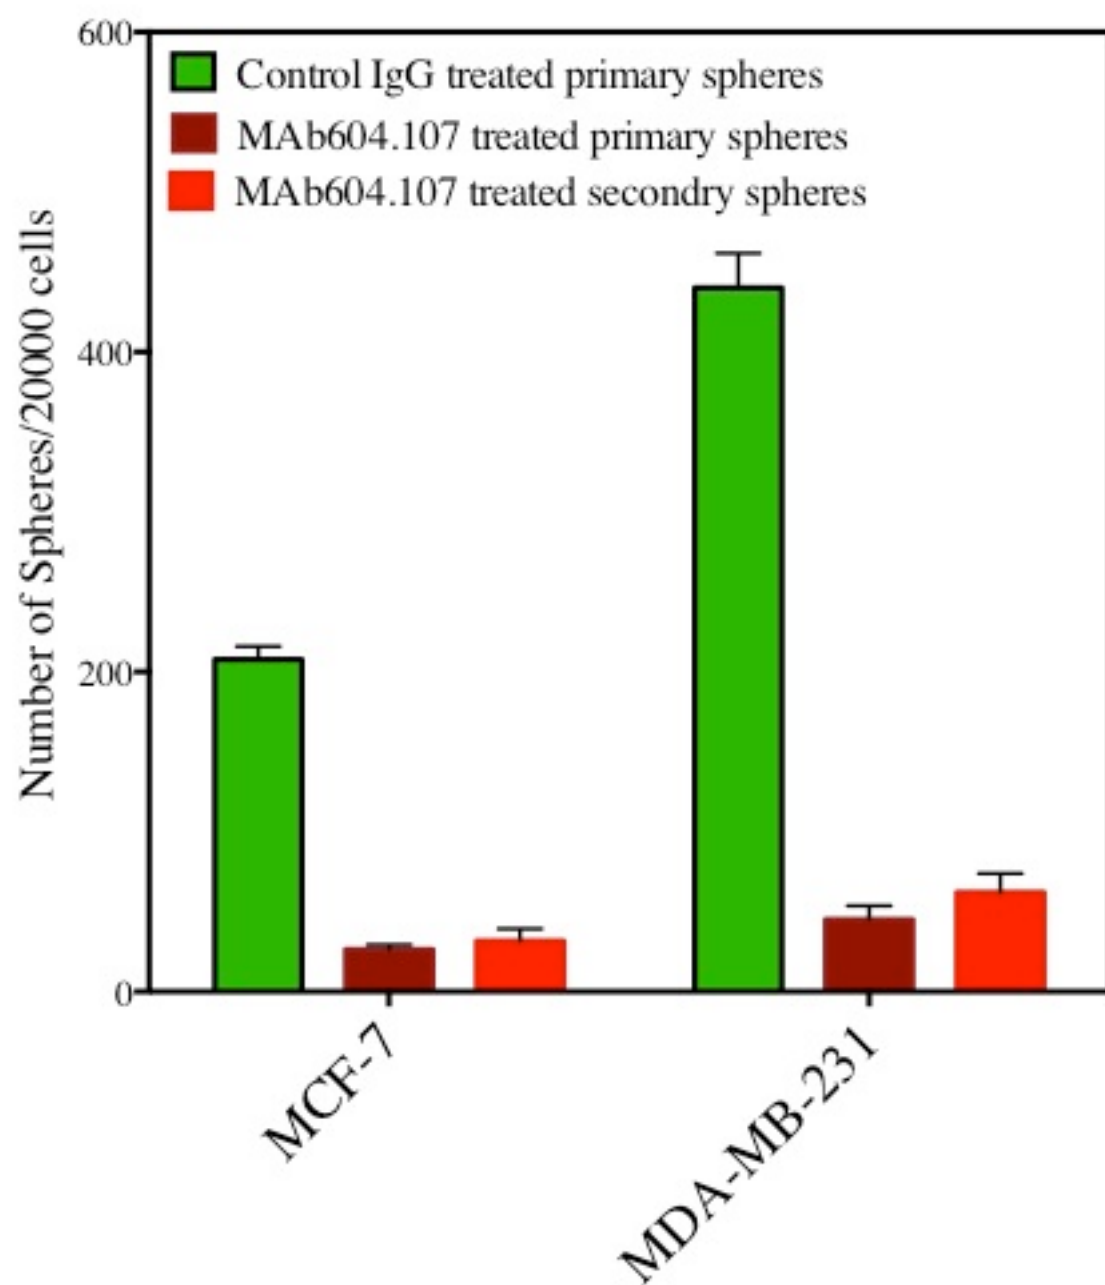

# Supplementary Figure-4

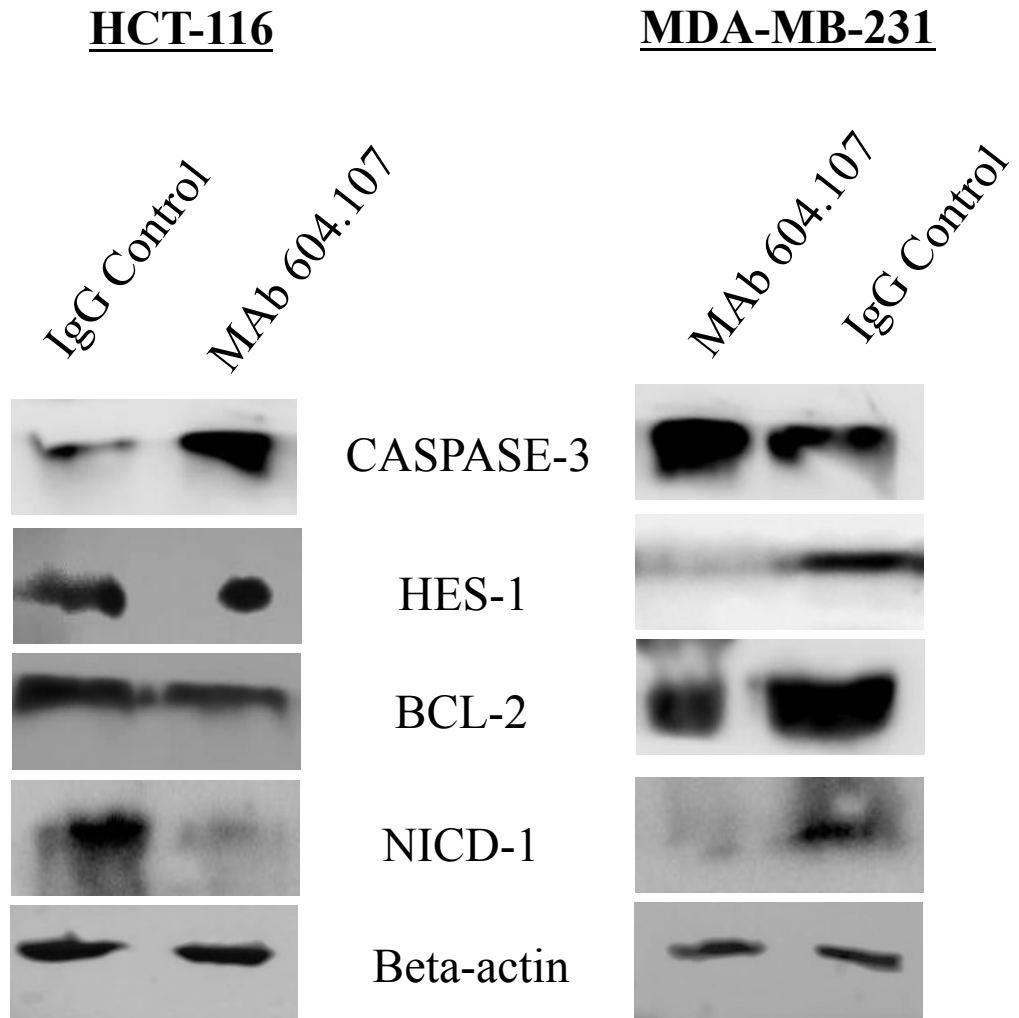

# Supplementary Figure-5

MDA-MB-231

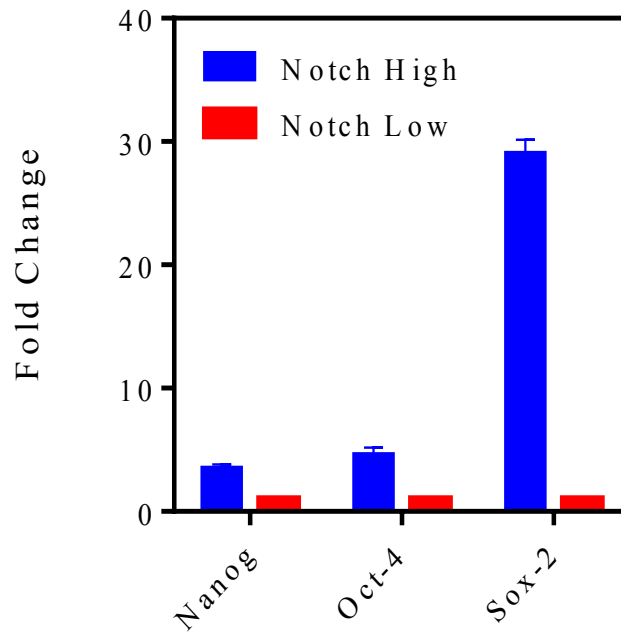

HCT-116

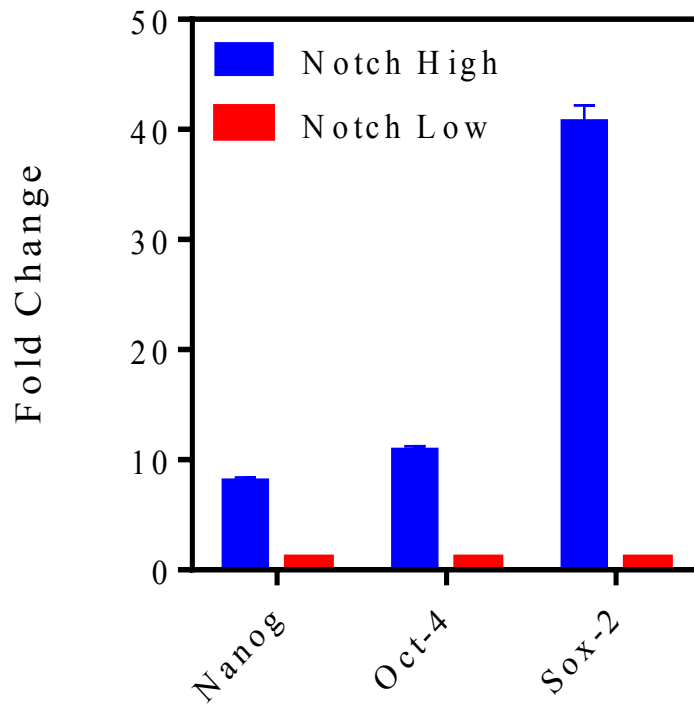

# Supplementary Figure-6

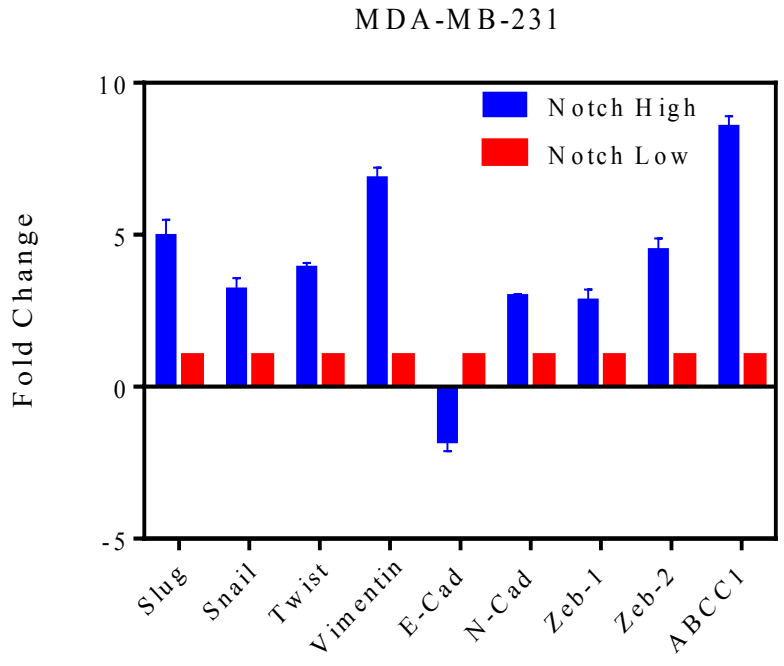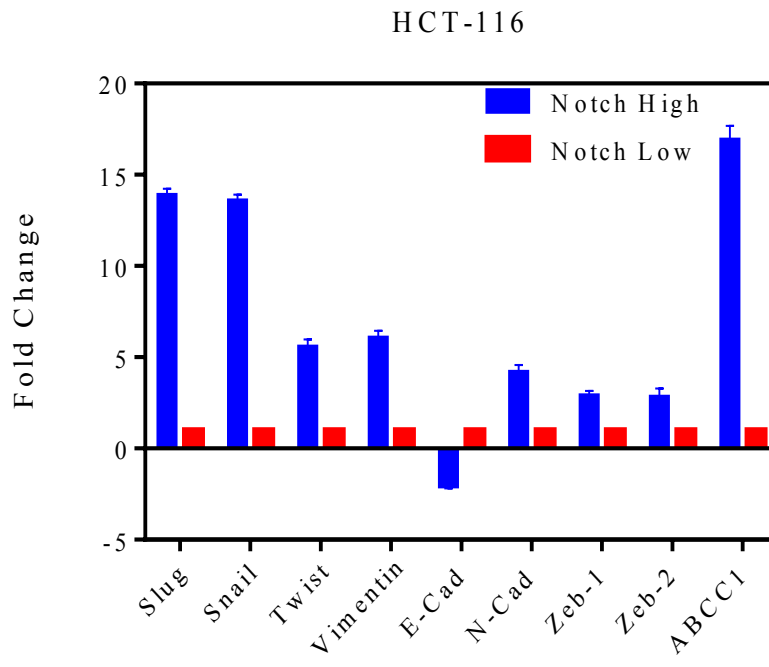



# Supplementary Figure-7

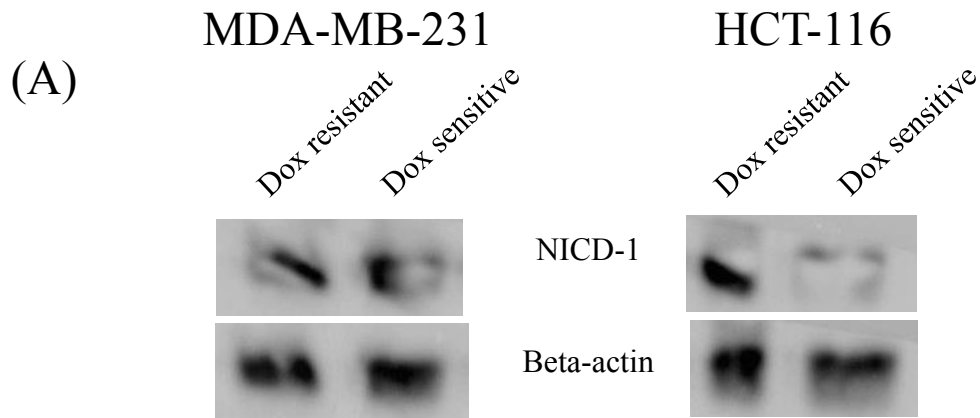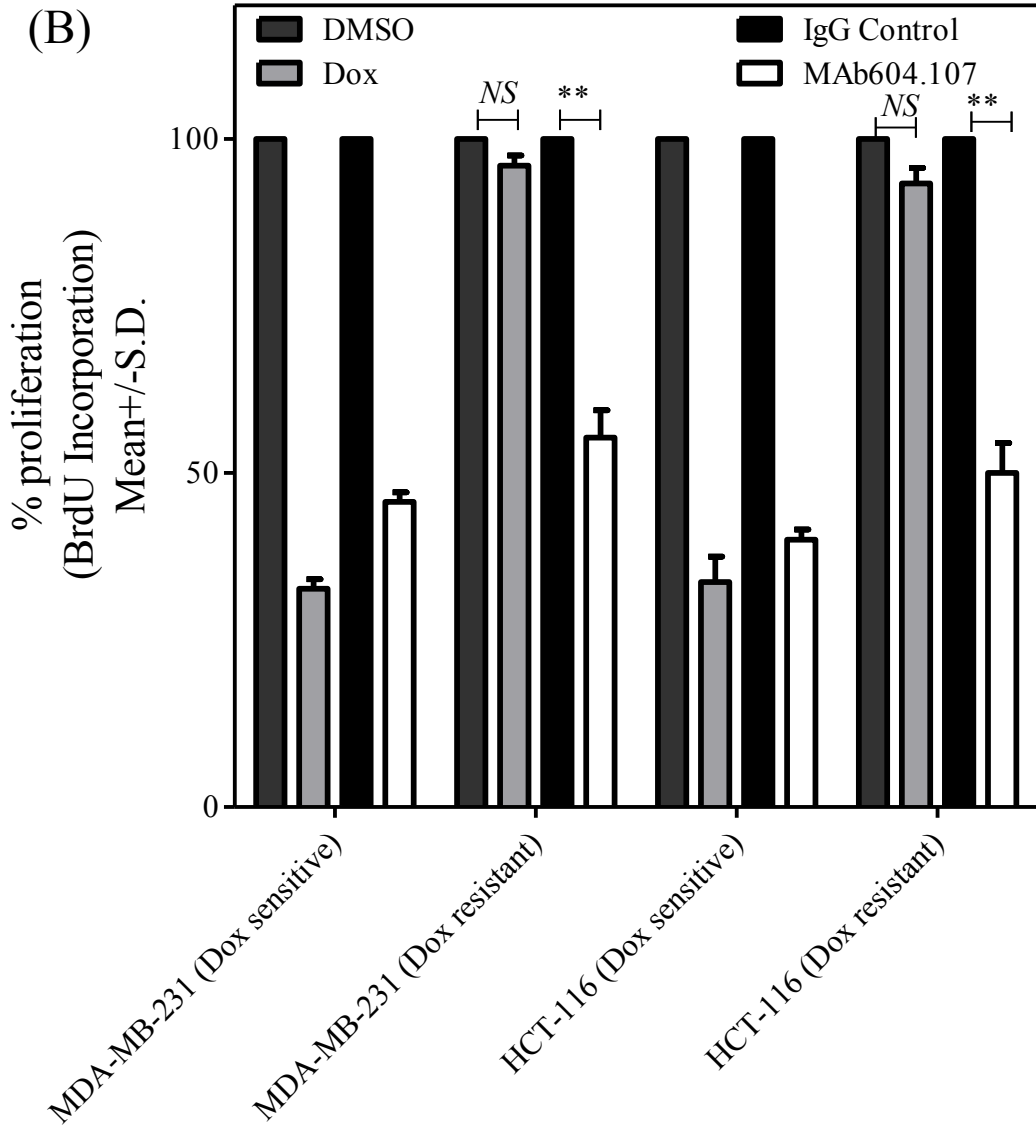

# Supplementary Figure-8

MDA-MB-231

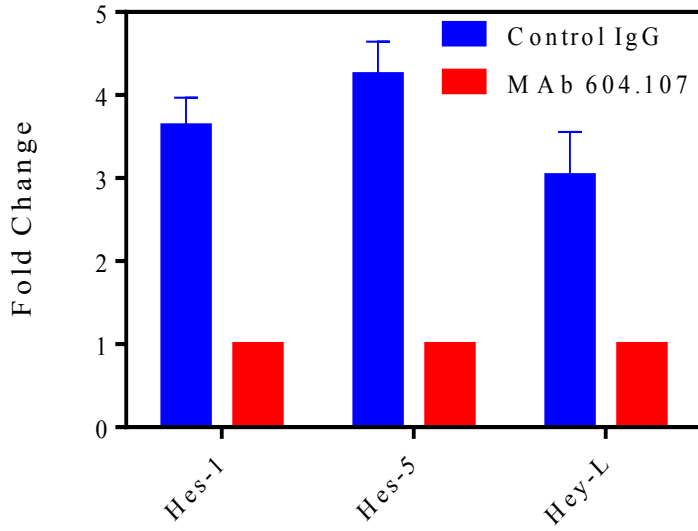

MDA-MB-231

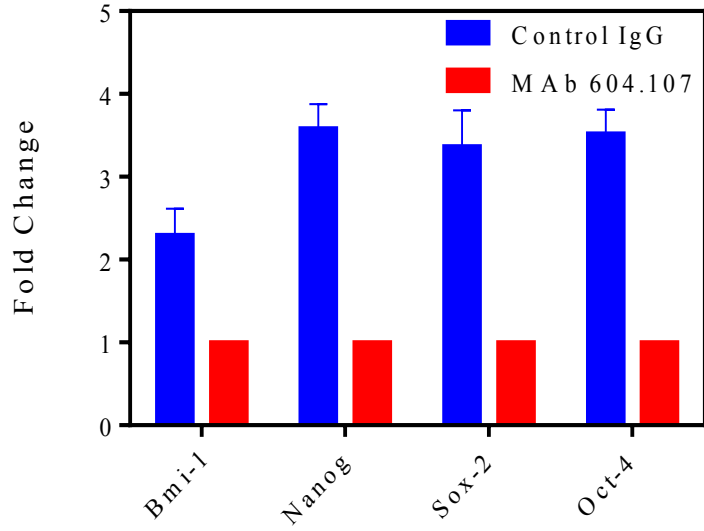

HCT-116

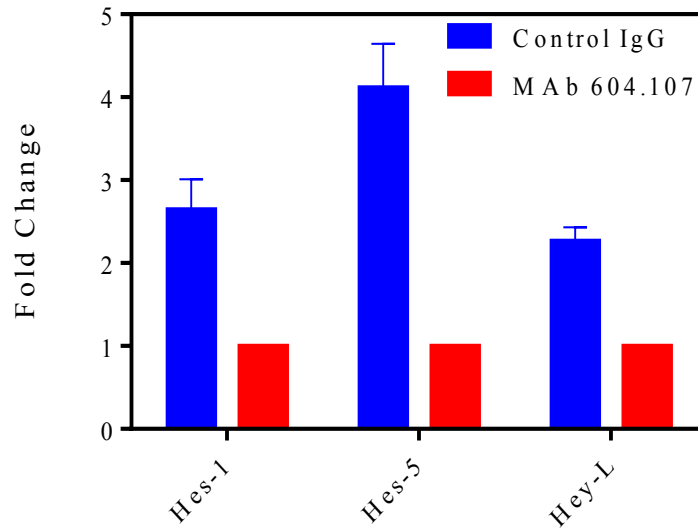

HCT-116

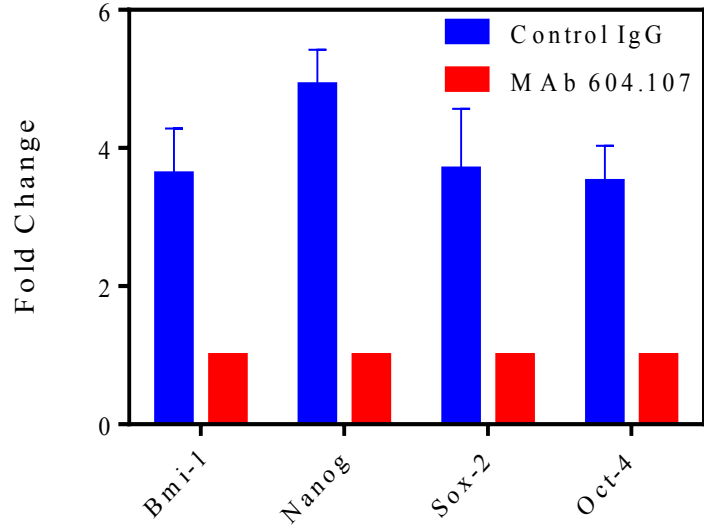

Supplementary Figure-9

Control IgG treated  
tumors

604.107 treated  
tumors

MDA-MB-231

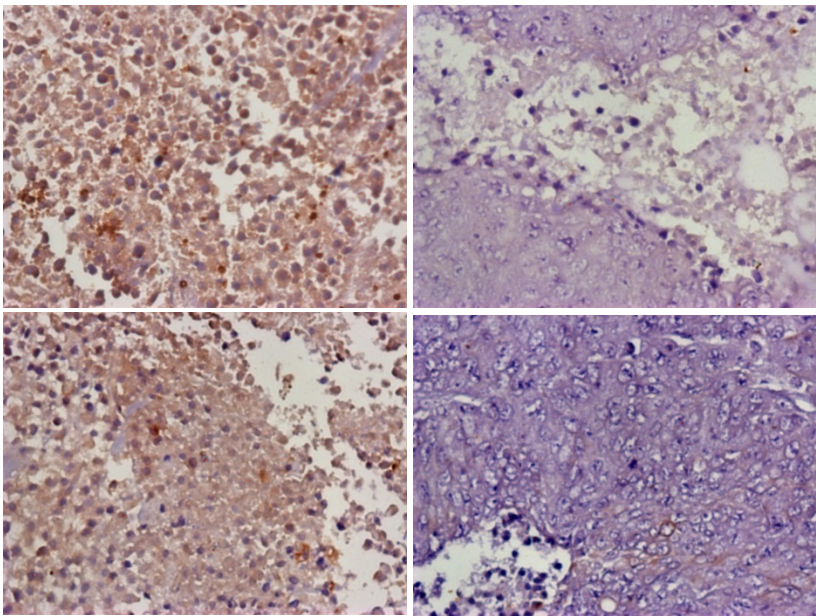

Control IgG treated  
tumors

604.107 treated  
tumors

HCT-116

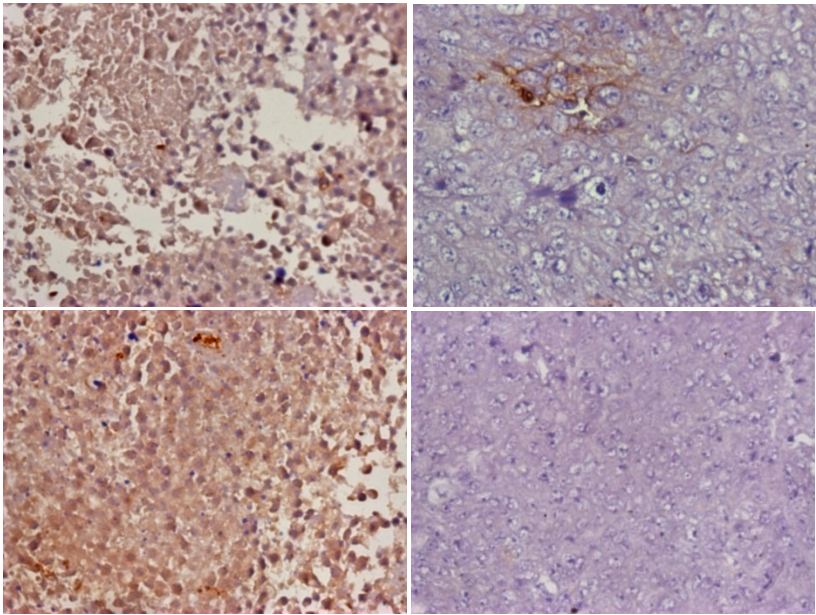

Supplementary Figure-10

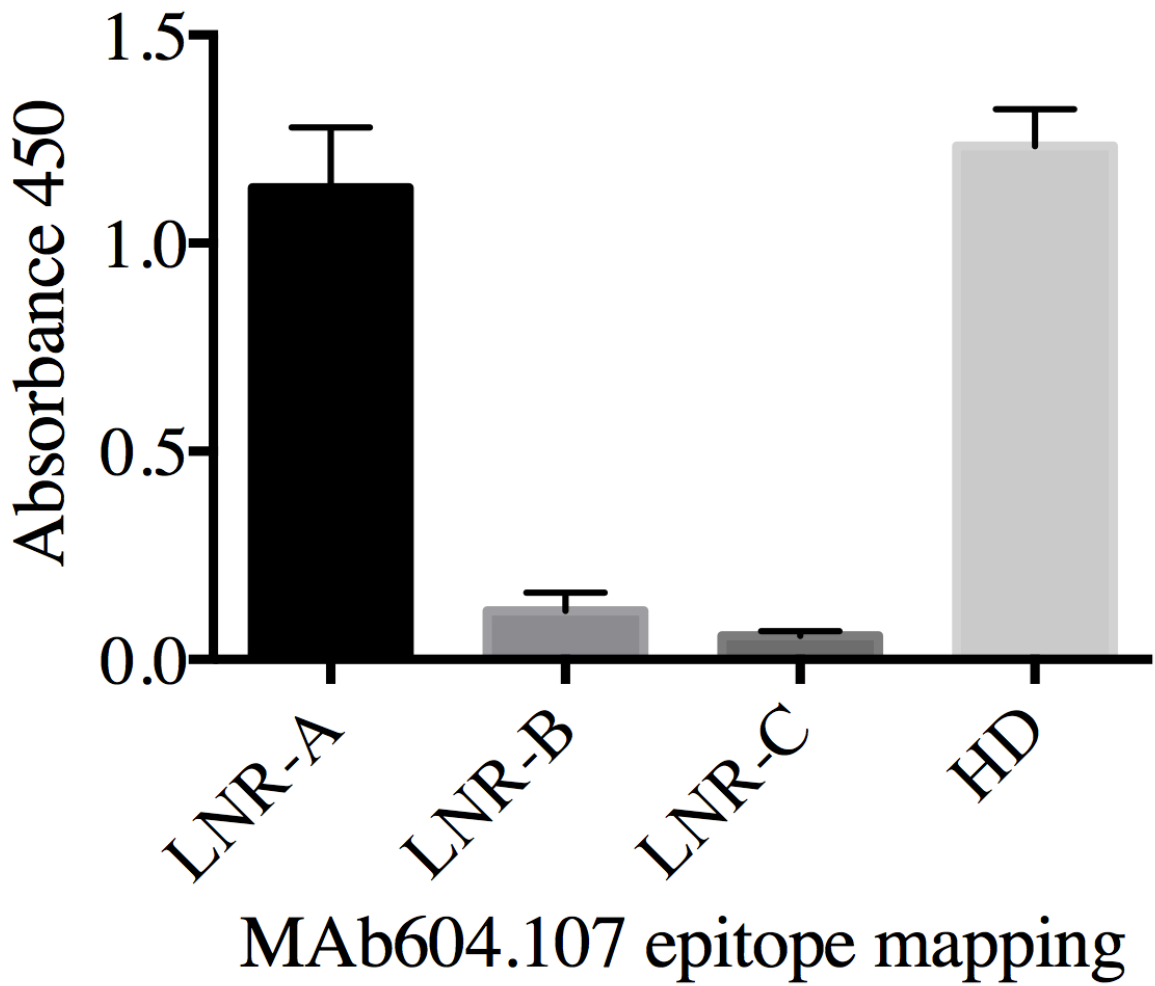

## Supplementary Table-1

| <b>MAb</b> | <b>Putative epitopes in Notch1 NRR domain</b> | <b>NRR domain</b>              |
|------------|-----------------------------------------------|--------------------------------|
| 604.107    | LRNSSFHFLRELSRVL<br>HTNVVFKRD                 | Heterodimerization (HD) domain |
| 604.107    | SLNFNDPWKNCTQSL<br>QCWKYFS                    | LNR-A                          |
| 604.132    | IFPYYGREEELRK                                 | HD                             |
| 604.132    | SLNFNDPWKNCTQSL<br>QCWKYFS                    | LNR-B                          |
| 604.164    | HGQQMIFPYY                                    | HD                             |

## Supplementary Table-2

| Properties of MAb                       | Present study<br>604.107<br>(Sharma et al.,)                                            | Previous study <sup>18</sup><br>(Wu et al., Nature<br>2010) |
|-----------------------------------------|-----------------------------------------------------------------------------------------|-------------------------------------------------------------|
| Effect on wild-type Notch signaling     | Inhibitory (at higher dose)                                                             | Inhibitory                                                  |
| Affinity for wild-type Notch1           | $5.08 \times 10^{-8}$                                                                   | $2.5 \times 10^{-9}$                                        |
| Effect on mutant Notch1                 | Inhibitory (both at higher and lower doses)                                             | Inhibitory                                                  |
| Affinity for mutant Notch1              | $5.08 \times 10^{-9}$                                                                   | ND                                                          |
| Specificity for mutant Notch1           | At lower concentration specific for mutant Notch1 without affecting wild-type signaling | ND                                                          |
| Effect on LIC subpopulation             | Deplete LIC subpopulation                                                               | ND                                                          |
| Impact on CSC and chemoresistance cells | Irreversibly inhibit CSCs                                                               | ND                                                          |

ND- not determined
